# Supplementary material
Source: HighWire-hosted journal article supplement (https://thorax.bmj.com/content/suppl/2004/02/18/59.2.94)
Supplement: 59294tab2.pdf [file 59294tab2.pdf]

**Table S2** Outcome comparisons for number of action points

| <b>Outcome</b>                | <b>4 Action points</b>           | <b>No. of studies</b> | <b>&lt; 4 Action points</b>      | <b>No. of studies</b> |
|-------------------------------|----------------------------------|-----------------------|----------------------------------|-----------------------|
| Hospitalisations*             | 0.65 (0.48 to 0.88) <sup>+</sup> | 6[8,9,15,18,23,24]    | 0.23 (0.07 to 0.71) <sup>+</sup> | 3[19,21,27]           |
| ER visits*                    | 0.65 (0.46 to 0.92) <sup>+</sup> | 5[8,9,18,23,24]       | 0.89 (0.73 to 1.07)              | 4[19,21,22,27]        |
| Unscheduled Dr visits*        | 0.44 (0.17 to 1.14)              | 2[18,23]              | 0.79 (0.64 to 0.97) <sup>+</sup> | 2[19,21]              |
| Days off work*                | 0.87 (0.62 to 1.23)              | 2[18,24]              | 0.74 (0.56 to 0.97) <sup>+</sup> | 3[19,21,27]           |
| Nocturnal asthma*             | 0.65 (0.38 to 1.11)              | 2[18,24]              | 1.0 (0.92 to 1.08)               | 1[19]                 |
| FEV <sub>1</sub> <sup>#</sup> | 0.11 (-0.36 to 0.57)             | 1[20]                 | 0.37 (0.02 to 0.73) <sup>+</sup> | 2[19,27]              |
| PEF <sup>#</sup>              | 0.34 (0.16 to 0.53) <sup>+</sup> | 3[15,20,24]           | 0.56 (0.20 to 0.92) <sup>+</sup> | 2[19,27]              |

\*Relative risk (95% CI).

<sup>#</sup>Standardised mean difference (95% CI).

<sup>+</sup> p<0.05.
